# Supplementary material for: Kinetics of Magnesiothermic Reduction of Natural Quartz
Source: MDPI journal article supplement (doi:10.3390/ma15196535), 2022-09-21
Supplement: s1 [file s1]

Supplementary material for:

## **Kinetics of Magnesiothermic Reduction of Natural Quartz**

**Azam Rasouli \*, Maria Tsoutsouva, Jafar Safarian and Gabriella Tranell**

Department of Materials Science and Engineering, Norwegian University of Science and Technology, 7491 Trondheim, Norway

\* Correspondence: [azam.rasouli@ntnu.no](mailto:azam.rasouli@ntnu.no)

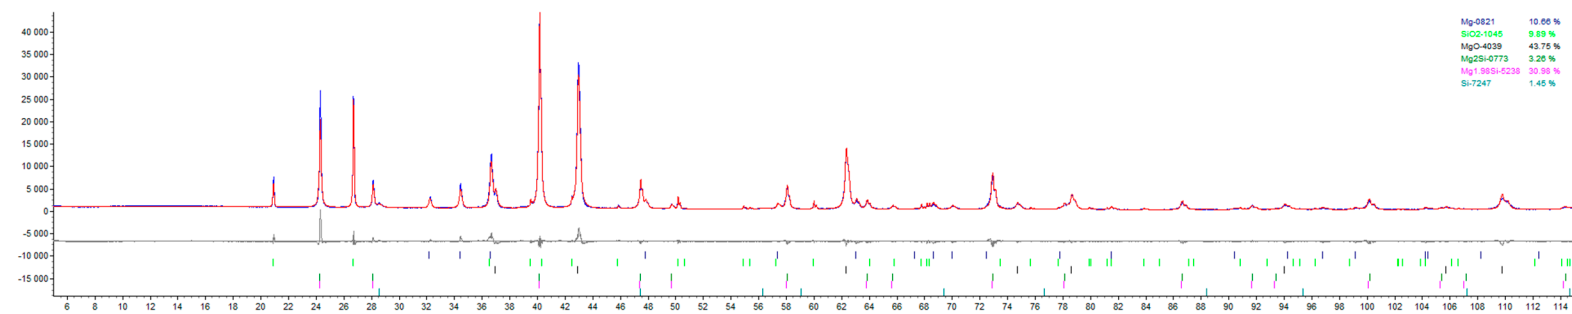

**Figure S1.** Rietveld refinement result of the sample with a Mg/SiO<sub>2</sub> mole ratio of 4, 1173 K and 240 minutes reaction time.

**Table S1.** The comparison of chemical compositions of samples with known compositions and values obtained from quantitative phase analysis.

| phases             | Chemical composition (wt%) |      |            |          |      |            |          |      |            |
|--------------------|----------------------------|------|------------|----------|------|------------|----------|------|------------|
|                    | Sample 1                   |      |            | Sample 2 |      |            | Sample 3 |      |            |
|                    | Known                      | QPA  | difference | Known    | QPA  | difference | Known    | QPA  | difference |
| SiO <sub>2</sub>   | 34.3                       | 37.7 | -3.4       | 38.9     | 41.9 | -3.0       | 23.5     | 26.9 | -3.4       |
| Mg                 | -                          | -    | -          | 61.1     | 58.1 | 3.0        | 2.2      | 2.0  | 0.2        |
| Si                 | 10.3                       | 8.3  | 2.0        | -        | -    | -          | 23.7     | 22.3 | 1.4        |
| Mg <sub>2</sub> Si | -                          | -    | -          | -        | -    | -          | 2.2      | 1.8  | 0.4        |
| MgO                | 55.4                       | 54.0 | 1.4        | -        | -    | -          | 48.3     | 47.1 | 1.2        |

  

| phases             | Chemical composition (wt%) |      |            |          |      |            |          |      |            |
|--------------------|----------------------------|------|------------|----------|------|------------|----------|------|------------|
|                    | Sample 4                   |      |            | Sample 5 |      |            | Sample 6 |      |            |
|                    | Known                      | QPA  | difference | Known    | QPA  | difference | Known    | QPA  | difference |
| SiO <sub>2</sub>   | 11.2                       | 13.5 | -2.3       | -        | -    | -          | -        | -    | -          |
| Mg                 | 10.3                       | 9.1  | 1.2        | 2.0      | 2.5  | -0.5       | -        | -    | -          |
| Si                 | 2.2                        | 2.4  | -0.2       | -        | -    | -          | 25.7     | 24.7 | 1.0        |
| Mg <sub>2</sub> Si | 30.1                       | 29.5 | 0.6        | 47.4     | 44.5 | 2.9        | -        | -    | -          |
| MgO                | 46.1                       | 45.5 | 0.6        | 50.6     | 53.1 | -2.5       | 74.3     | 75.3 | -1         |

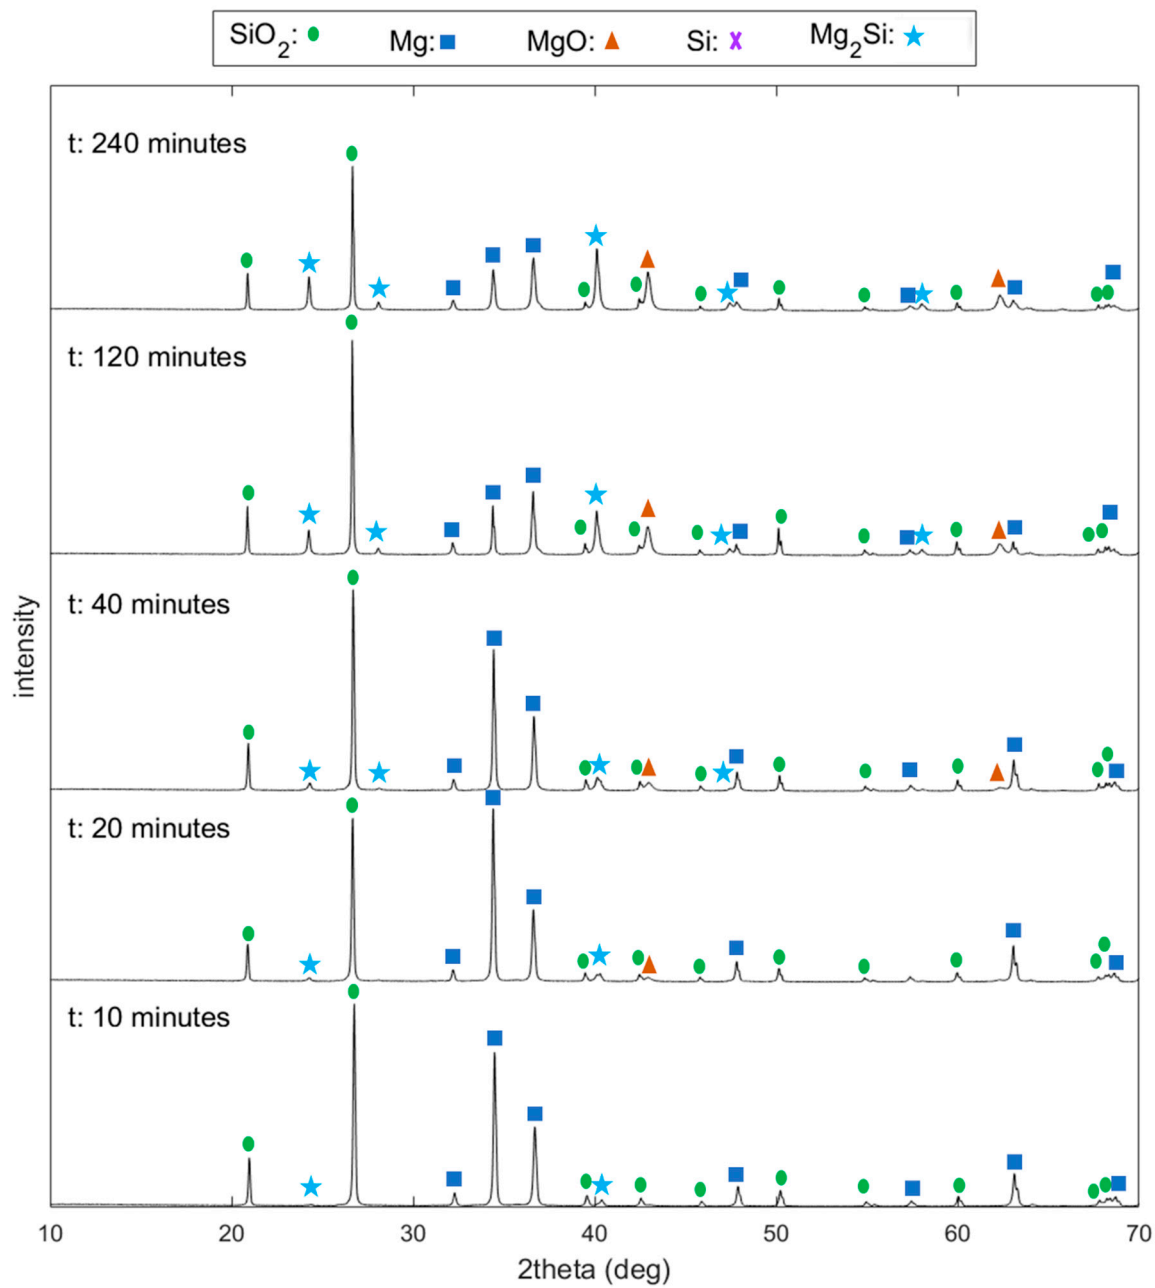

**Figure S2.** X-ray diffraction patterns at a Mg/SiO<sub>2</sub> mole ratio of 4, 1073 K and various reaction times.

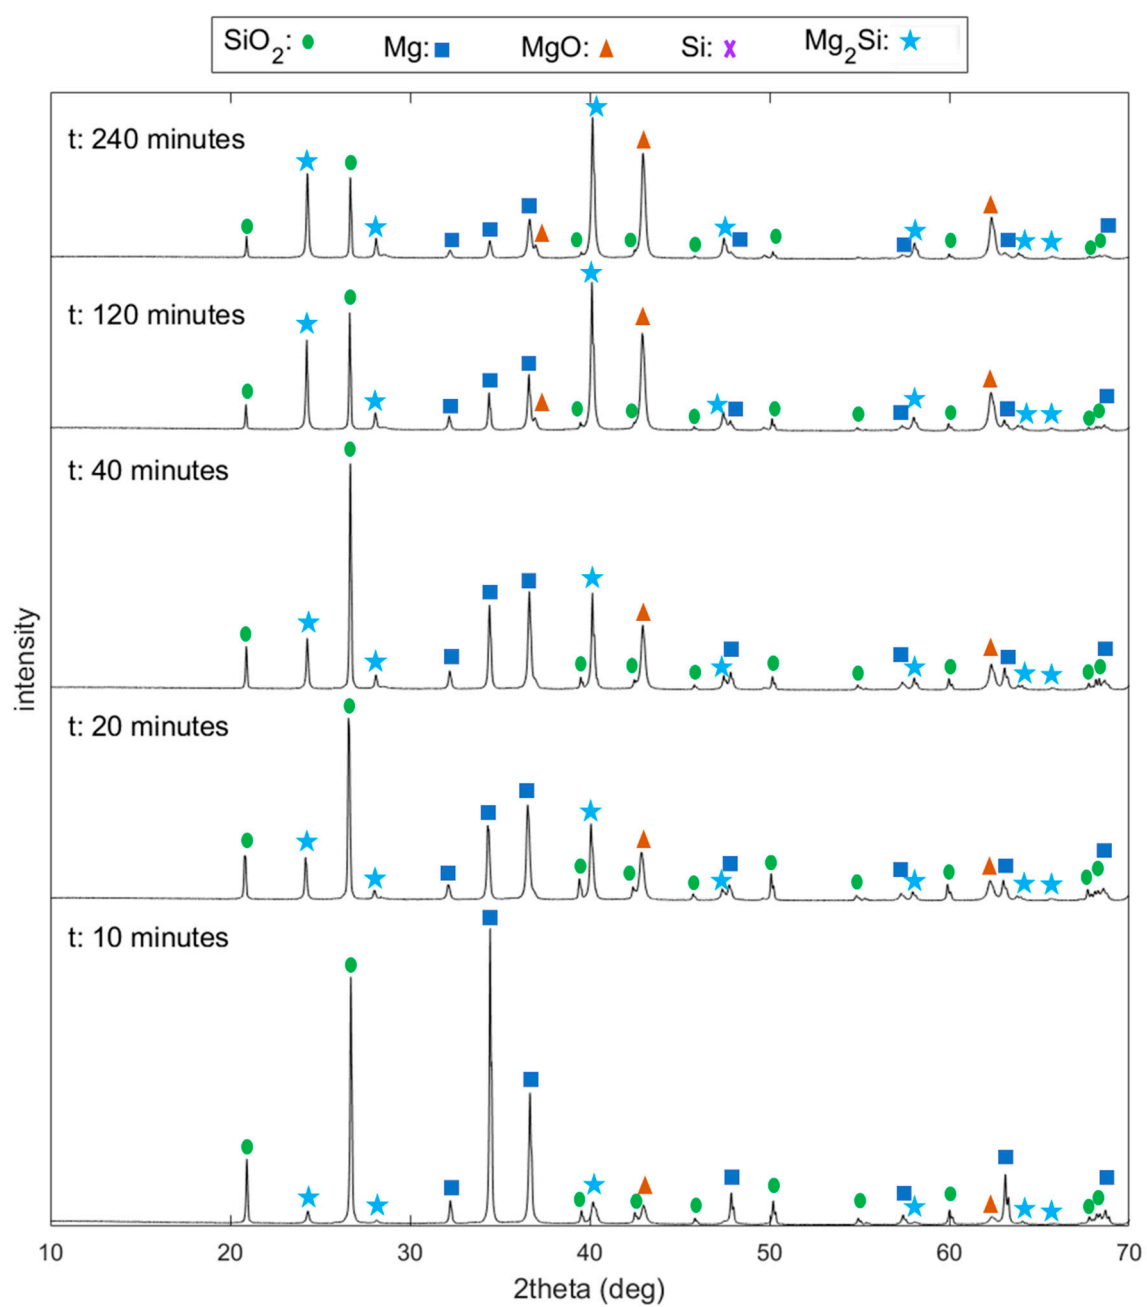

**Figure S3.** X-ray diffraction patterns at a Mg/SiO<sub>2</sub> mole ratio of 4, 1173 K and various reaction times.

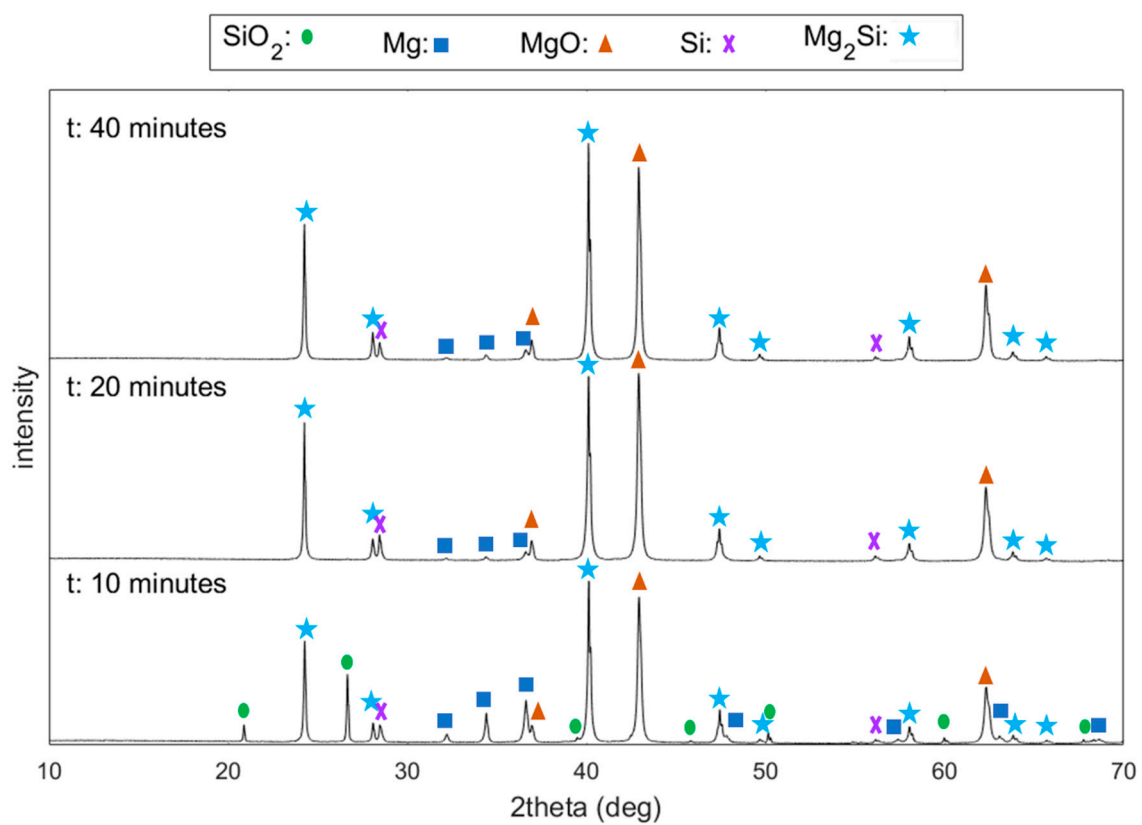

**Figure S4.** X-ray diffraction patterns at a Mg/SiO<sub>2</sub> mole ratio of 4, 1273 K and various reaction times.

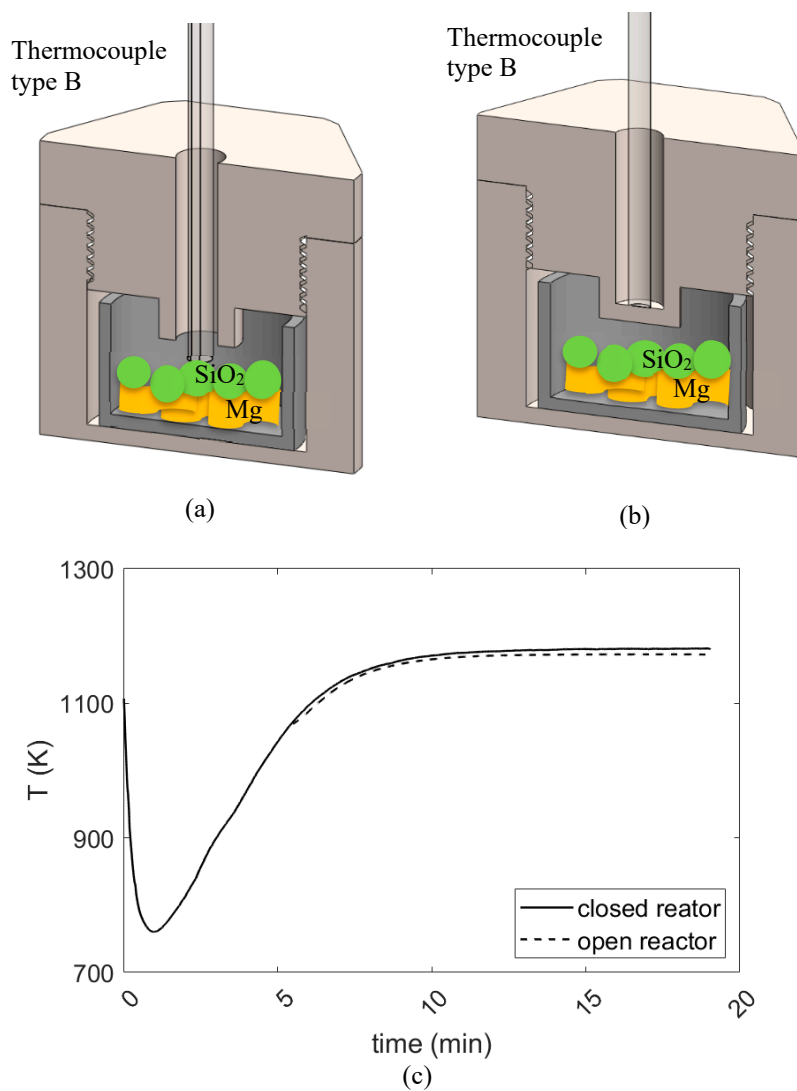

**Figure S5.** (a) Closed reactor used to conduct experiments; (b) open reactor to measure temperature close to reactant during a reduction reaction; (c) measured temperature against reaction time for two set-ups.

**Table S2.** Heat capacity of phases obtained from HSC Chemistry 9 software.

| Phases             | Temperature Range (K) | Heat Capacity (J/K.Kg)                                                                                                        |
|--------------------|-----------------------|-------------------------------------------------------------------------------------------------------------------------------|
| SiO <sub>2</sub>   | 298.15–847 (s)        | $(58.082 - 0.033 \times 10^{-3} \times T - 14.259 \times 10^5 \times T^{-2} + 28.221 \times 10^{-6} \times T^2) / (0.060083)$ |
|                    | 847–1079 (s)          | $(58.873 + 10.071 \times 10^{-3} \times T + 0.117 \times 10^5 \times T^{-2}) / (0.060083)$                                    |
|                    | 1079–1996 (s)         | $(72.735 + 1.331 \times 10^{-3} \times T - 41.288 \times 10^5 \times T^{-2} - 0.013 \times 10^{-6} \times T^2) / (0.060083)$  |
|                    | 1996–4700 (l)         | 83.5/0.060083                                                                                                                 |
| MgO                | 298.15–1700 (s)       | $(47.485 - 4.648 \times 10^{-3} \times T - 10.34 \times 10^5 \times T^{-2} - 0.268 \times 10^{-6} \times T^2) / (0.0403)$     |
|                    | 1700–3100 (s)         | $(78.297 - 19.425 \times 10^{-3} \times T - 171.03 \times 10^5 \times T^{-2} + 5.156 \times 10^{-6} \times T^2) / (0.0403)$   |
| Mg <sub>2</sub> Si | 298.15–1373 (s)       | $(73.304 + 14.979 \times T \times 10^{-3} - 8.828 \times T^{-2} \times 10^5) / 0.0766$                                        |
|                    | 1373–2000 (l)         | (94.14)/0.0766                                                                                                                |



**Table S3.** Density and thermal conductivity of phases obtained from FactSage 8.1 software.

| Temperature (K) | Phases properties            |                                                           |                              |                                                           |
|-----------------|------------------------------|-----------------------------------------------------------|------------------------------|-----------------------------------------------------------|
|                 | MgO                          |                                                           | SiO <sub>2</sub>             |                                                           |
|                 | Density (kg/m <sup>3</sup> ) | Thermal Conductivity (W.m <sup>-1</sup> K <sup>-1</sup> ) | Density (kg/m <sup>3</sup> ) | Thermal Conductivity (W.m <sup>-1</sup> K <sup>-1</sup> ) |
| 1050            | 3475.90                      | 16.31                                                     | 2554.10                      | 4.48                                                      |
| 1060            | 3474.30                      | 16.16                                                     | 2552.60                      | 4.44                                                      |
| 1070            | 3472.70                      | 16.01                                                     | 2551.20                      | 4.39                                                      |
| 1080            | 3471.20                      | 15.87                                                     | 2549.70                      | 4.36                                                      |
| 1090            | 3469.60                      | 15.72                                                     | 2548.30                      | 4.32                                                      |
| 1100            | 3468.00                      | 15.58                                                     | 2546.80                      | 4.28                                                      |
| 1110            | 3466.40                      | 15.45                                                     | 2545.40                      | 4.24                                                      |
| 1120            | 3464.80                      | 15.31                                                     | 2543.90                      | 4.20                                                      |
| 1130            | 3463.20                      | 15.18                                                     | 2542.40                      | 4.17                                                      |
| 1140            | 3461.70                      | 15.05                                                     | 2540.90                      | 4.13                                                      |
| 1150            | 3460.10                      | 14.92                                                     | 2235.90                      | 1.08                                                      |
| 1160            | 3458.50                      | 14.79                                                     | 2238.10                      | 1.07                                                      |
| 1170            | 3456.90                      | 14.67                                                     | 2240.30                      | 1.06                                                      |
| 1180            | 3455.30                      | 14.55                                                     | 2242.60                      | 1.05                                                      |
| 1190            | 3453.70                      | 14.43                                                     | 2245.00                      | 1.04                                                      |
| 1200            | 3452.10                      | 14.31                                                     | 2247.50                      | 1.03                                                      |
| 1210            | 3450.50                      | 14.19                                                     | 2250.00                      | 1.02                                                      |
| 1220            | 3448.90                      | 14.08                                                     | 2252.60                      | 1.01                                                      |
| 1230            | 3447.30                      | 13.97                                                     | 2255.20                      | 1.00                                                      |
| 1240            | 3445.60                      | 13.86                                                     | 2257.90                      | 0.99                                                      |
| 1250            | 3444.00                      | 13.75                                                     | 2260.70                      | 0.99                                                      |
| 1260            | 3442.40                      | 13.64                                                     | 2263.50                      | 0.98                                                      |
| 1270            | 3440.80                      | 13.54                                                     | 2266.40                      | 0.97                                                      |
| 1280            | 3439.20                      | 13.43                                                     | 2269.40                      | 0.96                                                      |
| 1290            | 3437.50                      | 13.33                                                     | 2272.40                      | 0.95                                                      |
| 1300            | 3435.90                      | 13.23                                                     | 2275.60                      | 0.95                                                      |
| 1310            | 3434.30                      | 13.13                                                     | 2278.70                      | 0.94                                                      |
| 1320            | 3432.70                      | 13.03                                                     | 2282.00                      | 0.93                                                      |
| 1330            | 3431.00                      | 12.94                                                     | 2285.30                      | 0.92                                                      |
| 1340            | 3429.40                      | 12.84                                                     | 2288.60                      | 0.92                                                      |
| 1350            | 3427.80                      | 12.75                                                     | 2292.10                      | 0.91                                                      |
| 1360            | 3426.10                      | 12.66                                                     | 2295.60                      | 0.90                                                      |
| 1370            | 3424.50                      | 12.57                                                     | 2299.20                      | 0.89                                                      |
| 1380            | 3422.80                      | 12.48                                                     | 2302.80                      | 0.89                                                      |
| 1390            | 3421.20                      | 12.39                                                     | 2306.50                      | 0.88                                                      |
| 1400            | 3419.50                      | 12.31                                                     | 2310.30                      | 0.87                                                      |
| 1410            | 3417.90                      | 12.22                                                     | 2314.20                      | 0.87                                                      |
| 1420            | 3416.20                      | 12.14                                                     | 2318.10                      | 0.86                                                      |
| 1430            | 3414.60                      | 12.05                                                     | 2322.10                      | 0.85                                                      |
| 1440            | 3412.90                      | 11.97                                                     | 2326.10                      | 0.85                                                      |
| 1450            | 3411.30                      | 11.89                                                     | 2330.30                      | 0.84                                                      |
| 1460            | 3409.60                      | 11.81                                                     | 2334.50                      | 0.84                                                      |
| 1470            | 3407.90                      | 11.73                                                     | 2338.80                      | 0.83                                                      |

|      |         |       |         |      |
|------|---------|-------|---------|------|
| 1480 | 3406.30 | 11.66 | 2343.10 | 0.82 |
| 1490 | 3404.60 | 11.58 | 2347.50 | 0.82 |
| 1500 | 3402.90 | 11.50 | 2352.00 | 0.81 |
| 1510 | 3401.30 | 11.43 | 2356.60 | 0.80 |
| 1520 | 3399.60 | 11.36 | 2361.30 | 0.80 |
| 1530 | 3397.90 | 11.28 | 2366.00 | 0.79 |
| 1540 | 3396.30 | 11.21 | 2370.80 | 0.79 |
| 1550 | 3394.60 | 11.14 | 2375.70 | 0.78 |
| 1560 | 3392.90 | 11.07 | 2380.60 | 0.78 |
| 1570 | 3391.20 | 11.00 | 2385.60 | 0.77 |
| 1580 | 3389.50 | 10.94 | 2390.70 | 0.77 |
| 1590 | 3387.80 | 10.87 | 2395.90 | 0.76 |
| 1600 | 3386.10 | 10.80 | 2401.20 | 0.75 |
| 1610 | 3384.50 | 10.74 | 2406.50 | 0.75 |
| 1620 | 3382.80 | 10.67 | 2411.90 | 0.74 |
| 1630 | 3381.10 | 10.61 | 2417.40 | 0.74 |
| 1640 | 3379.40 | 10.55 | 2423.00 | 0.73 |
| 1650 | 3377.70 | 10.49 | 2428.60 | 0.73 |
| 1660 | 3376.00 | 10.42 | 2434.30 | 0.72 |
| 1670 | 3374.30 | 10.36 | 2440.10 | 0.72 |
| 1680 | 3372.60 | 10.30 | 2446.00 | 0.71 |
| 1690 | 3370.90 | 10.24 | 2452.00 | 0.71 |
| 1700 | 3369.10 | 10.19 | 2458.10 | 0.71 |
| 1710 | 3367.40 | 10.13 | 2464.20 | 0.70 |
| 1720 | 3365.70 | 10.07 | 2470.40 | 0.70 |
| 1730 | 3364.00 | 10.01 | 2476.70 | 0.69 |
| 1740 | 3362.30 | 9.96  | 2483.10 | 0.69 |
| 1750 | 3360.60 | 9.90  | 2489.60 | 0.68 |
| 1760 | 3358.80 | 9.85  | 1917.50 | 2.45 |
| 1770 | 3357.10 | 9.79  | 1913.90 | 2.44 |
| 1780 | 3355.40 | 9.74  | 1910.20 | 2.43 |
| 1790 | 3353.70 | 9.69  | 1906.50 | 2.42 |
| 1800 | 3351.90 | 9.64  | 1902.80 | 2.41 |
| 1810 | 3350.20 | 9.59  | 1899.10 | 2.39 |
| 1820 | 3348.50 | 9.53  | 1895.40 | 2.38 |
| 1830 | 3346.70 | 9.48  | 1891.60 | 2.37 |
| 1840 | 3345.00 | 9.43  | 1887.90 | 2.36 |
| 1850 | 3343.30 | 9.38  | 1884.20 | 2.35 |
| 1860 | 3341.50 | 9.34  | 1880.40 | 2.34 |
| 1870 | 3339.80 | 9.29  | 1876.70 | 2.33 |
| 1880 | 3338.00 | 9.24  | 1872.90 | 2.32 |
| 1890 | 3336.30 | 9.19  | 1869.10 | 2.30 |
| 1900 | 3334.50 | 9.15  | 1865.40 | 2.29 |
| 1910 | 3332.80 | 9.10  | 1861.60 | 2.28 |
| 1920 | 3331.00 | 9.05  | 1857.80 | 2.27 |
| 1930 | 3329.30 | 9.01  | 1854.00 | 2.26 |
| 1940 | 3327.50 | 8.96  | 1850.20 | 2.25 |
| 1950 | 3325.80 | 8.92  | 1846.40 | 2.24 |
| 1960 | 3324.00 | 8.88  | 1842.60 | 2.23 |

|      |         |      |         |      |
|------|---------|------|---------|------|
| 1970 | 3322.30 | 8.83 | 1838.70 | 2.22 |
| 1980 | 3320.50 | 8.79 | 1834.90 | 2.21 |
| 1990 | 3318.70 | 8.75 | 1831.10 | 2.20 |
| 2000 | 3317.00 | 8.70 | 2335.00 | -    |
| 2010 | 3315.20 | 8.66 | -       | -    |
| 2020 | 3313.40 | 8.62 | -       | -    |
| 2030 | 3311.70 | 8.58 | -       | -    |
| 2040 | 3309.90 | 8.54 | -       | -    |
| 2050 | 3308.10 | 8.50 | -       | -    |
| 2060 | 3306.30 | 8.46 | -       | -    |
| 2070 | 3304.50 | 8.42 | -       | -    |
| 2080 | 3302.80 | 8.38 | -       | -    |
| 2090 | 3301.00 | 8.34 | -       | -    |
| 2100 | 3299.20 | 8.30 | -       | -    |
| 2110 | 3297.40 | 8.27 | -       | -    |
| 2120 | 3295.60 | 8.23 | -       | -    |
| 2130 | 3293.80 | 8.19 | -       | -    |
| 2140 | 3292.00 | 8.16 | -       | -    |
| 2150 | 3290.20 | 8.12 | -       | -    |
| 2160 | 3288.50 | 8.08 | -       | -    |
| 2170 | 3286.70 | 8.05 | -       | -    |
| 2180 | 3284.90 | 8.01 | -       | -    |
| 2190 | 3283.10 | 7.98 | -       | -    |
| 2200 | 3281.30 | 7.94 | -       | -    |
| 2210 | 3279.40 | 7.91 | -       | -    |
| 2220 | 3277.60 | 7.87 | -       | -    |
| 2230 | 3275.80 | 7.84 | -       | -    |
| 2240 | 3274.00 | 7.81 | -       | -    |
| 2250 | 3272.20 | 7.77 | -       | -    |
| 2260 | 3270.40 | 7.74 | -       | -    |
| 2270 | 3268.60 | 7.71 | -       | -    |
| 2280 | 3266.80 | 7.67 | -       | -    |
| 2290 | 3265.00 | 7.64 | -       | -    |
| 2300 | 3263.10 | 7.61 | -       | -    |
| 2310 | 3261.30 | 7.58 | -       | -    |
| 2320 | 3259.50 | 7.55 | -       | -    |
| 2330 | 3257.70 | 7.52 | -       | -    |
| 2340 | 3255.80 | 7.49 | -       | -    |
| 2350 | 3254.00 | 7.46 | -       | -    |
| 2360 | 3252.20 | 7.43 | -       | -    |
| 2370 | 3250.30 | 7.40 | -       | -    |
| 2380 | 3248.50 | 7.37 | -       | -    |
| 2390 | 3246.70 | 7.34 | -       | -    |
| 2400 | 3244.80 | 7.31 | -       | -    |
| 2410 | 3243.00 | 7.28 | -       | -    |
| 2420 | 3241.20 | 7.25 | -       | -    |
| 2430 | 3239.30 | 7.22 | -       | -    |
| 2440 | 3237.50 | 7.19 | -       | -    |
| 2450 | 3235.60 | 7.17 | -       | -    |

|      |         |      |   |   |
|------|---------|------|---|---|
| 2460 | 3233.80 | 7.14 | - | - |
| 2470 | 3231.90 | 7.11 | - | - |
| 2480 | 3230.10 | 7.08 | - | - |
| 2490 | 3228.20 | 7.06 | - | - |
| 2500 | 3226.40 | 7.03 | - | - |
| 2510 | 3224.50 | 7.00 | - | - |
| 2520 | 3222.70 | 6.98 | - | - |
| 2530 | 3220.80 | 6.95 | - | - |
| 2540 | 3219.00 | 6.92 | - | - |
| 2550 | 3217.10 | 6.90 | - | - |
| 2560 | 3215.20 | 6.87 | - | - |
| 2570 | 3213.40 | 6.85 | - | - |
| 2580 | 3211.50 | 6.82 | - | - |
| 2590 | 3209.60 | 6.80 | - | - |
| 2600 | 3207.80 | 6.77 | - | - |
| 2610 | 3205.90 | 6.75 | - | - |
| 2620 | 3204.00 | 6.72 | - | - |
| 2630 | 3202.10 | 6.70 | - | - |
| 2640 | 3200.30 | 6.67 | - | - |
| 2650 | 3198.40 | 6.65 | - | - |
| 2660 | 3196.50 | 6.63 | - | - |
| 2670 | 3194.60 | 6.60 | - | - |
| 2680 | 3192.80 | 6.58 | - | - |
| 2690 | 3190.90 | 6.56 | - | - |
| 2700 | 3189.00 | 6.53 | - | - |
| 2710 | 3187.10 | 6.51 | - | - |
| 2720 | 3185.20 | 6.49 | - | - |
| 2730 | 3183.30 | 6.47 | - | - |
| 2740 | 3181.40 | 6.44 | - | - |
| 2750 | 3179.50 | 6.42 | - | - |
| 2760 | 3177.60 | 6.40 | - | - |
| 2770 | 3175.70 | 6.38 | - | - |
| 2780 | 3173.80 | 6.36 | - | - |
| 2790 | 3172.00 | 6.33 | - | - |
| 2800 | 3170.10 | 6.31 | - | - |
| 2810 | 3168.10 | 6.29 | - | - |
| 2820 | 3166.20 | 6.27 | - | - |
| 2830 | 3164.30 | 6.25 | - | - |
| 2840 | 3162.40 | 6.23 | - | - |
| 2850 | 3160.50 | 6.21 | - | - |
| 2860 | 3158.60 | 6.19 | - | - |
